# Supplementary material for: The differential effects of CBD and CBDA on viability and mRNA expression in colorectal cancer cells
Source: Springer Nature journal article supplement (doi:10.1186/s42238-026-00391-2), 2026-01-16
Supplement: MOESM1 [file 42238_2026_391_MOESM1_ESM.pdf]

**Additional File 1a** Cannabinoids of C.s. extract

| <b>Cannabinoid</b>                                              | <b>Result [% solids]</b> |
|-----------------------------------------------------------------|--------------------------|
| <b>CBD</b> cannabidiol                                          | <b>0.137</b>             |
| <b>CBDA</b> cannabidiolic acid                                  | <b>2.45</b>              |
| <b>T-CBD</b> total cannabidiol (CBD+CBDA)                       | <b>2.29</b>              |
| <b>THC<math>\Delta</math>8</b> $\Delta$ -8-tetrahydrocannabinol | <b>&lt;0.010</b>         |
| <b>THC<math>\Delta</math>9</b> $\Delta$ -9-tetrahydrocannabinol | <b>0.012</b>             |
| <b>THCA</b> tetrahydrocannabinolic acid                         | <b>0.099</b>             |
| <b>T-THC</b> total tetrahydrocannabinol (THC+THCA)              | <b>0.099</b>             |
| <b>CBG</b> cannabigerol                                         | <b>0.014</b>             |
| <b>CBGA</b> cannabigerolic acid                                 | <b>0.079</b>             |
| <b>T-CBG</b> total cannabigerol (CBG+CBGA)                      | <b>0.083</b>             |
| <b>CBDV</b> cannabidivarin                                      | <b>&lt;0.010</b>         |
| <b>CBDVA</b> cannabidivarinic acid                              | <b>&lt;0.010</b>         |
| <b>THCV</b> tetrahydrocannabivarin                              | <b>&lt;0.010</b>         |
| <b>THCVA</b> tetrahydrocannabivarinic acid                      | <b>&lt;0.010</b>         |
| <b>CBN</b> cannabinol                                           | <b>&lt;0.010</b>         |
| <b>CBNA</b> cannabinolic acid                                   | <b>&lt;0.010</b>         |
| <b>CBL</b> cannabicyclol                                        | <b>&lt;0.010</b>         |
| <b>CBC</b> cannabichromene                                      | <b>&lt;0.010</b>         |
| <b>CBCA</b> cannabichromenic acid                               | <b>0.13</b>              |

All cannabinoids identified in the C.s. extract were analyzed by HPLC with UV/VIS detection. Results are expressed as in % of total solids.

**Additional File 1b** Terpenoids of C.s. extract

| <b>Terpenoids</b>              | <b>Result [mg/kg solids]</b> |
|--------------------------------|------------------------------|
| <b>alpha-Pinen</b>             | <b>150</b>                   |
| <b>Camphen</b>                 | <b>&lt; 10</b>               |
| <b>Sabinen</b>                 | <b>&lt; 10</b>               |
| <b>beta-Pinen</b>              | <b>27</b>                    |
| <b>beta-Myrcen</b>             | <b>190</b>                   |
| <b>alpha-Phellandren</b>       | <b>&lt; 10</b>               |
| <b>(+)-d-3-Caren</b>           | <b>&lt; 10</b>               |
| <b>alpha-Terpinen</b>          | <b>&lt; 10</b>               |
| <b>Limonen</b>                 | <b>21</b>                    |
| <b>trans-beta-Ocimen</b>       | <b>&lt; 10</b>               |
| <b>Eucalyptol</b>              | <b>&lt; 10</b>               |
| <b>cis-beta-Ocimen</b>         | <b>&lt; 10</b>               |
| <b>gamma-Terpinen</b>          | <b>&lt; 10</b>               |
| <b>Terpinolen</b>              | <b>&lt; 10</b>               |
| <b>Sabinenhydrat</b>           | <b>&lt; 10</b>               |
| <b>Linalool</b>                | <b>&lt; 10</b>               |
| <b>(+,-)-Fenchon</b>           | <b>&lt; 10</b>               |
| <b>(+)-endo-Fenchylalkohol</b> | <b>11</b>                    |
| <b>Isopulegol</b>              | <b>&lt; 10</b>               |
| <b>(+,-)-Camphor</b>           | <b>&lt; 10</b>               |
| <b>Isoborneol</b>              | <b>&lt; 10</b>               |
| <b>Menthol</b>                 | <b>&lt; 10</b>               |
| <b>(+,-)-Borneol</b>           | <b>&lt; 10</b>               |
| <b>alpha-Terpineol</b>         | <b>&lt; 10</b>               |
| <b>gamma-Terpineol</b>         | <b>&lt; 10</b>               |
| <b>Nerol</b>                   | <b>&lt; 10</b>               |
| <b>Pulegon</b>                 | <b>&lt; 10</b>               |
| <b>Geraniol</b>                | <b>&lt; 10</b>               |
| <b>Geranylacetat</b>           | <b>&lt; 10</b>               |
| <b>Farnesen</b>                | <b>&lt; 10</b>               |
| <b>alpha-Cedren</b>            | <b>85</b>                    |
| <b>trans-Caryophyllen</b>      | <b>51</b>                    |
| <b>alpha-Humulen</b>           | <b>&lt; 10</b>               |
| <b>Valencen</b>                | <b>&lt; 10</b>               |
| <b>cis-Nerolidol</b>           | <b>67</b>                    |
| <b>trans-Nerolidol</b>         | <b>16</b>                    |
| <b>(-)-Guaiol</b>              | <b>&lt; 10</b>               |
| <b>Caryophyllenoxid</b>        | <b>&lt; 10</b>               |
| <b>Cedrol</b>                  | <b>&lt; 10</b>               |
| <b>(-)-alpha-Bisabolol</b>     | <b>90</b>                    |

All terpenoids identified in the C.s. extract were analyzed by GC with FID detection. Results are expressed as in mg/kg of total solids.
