# Supplementary material for: The differential effects of CBD and CBDA on viability and mRNA expression in colorectal cancer cells
Source: Springer Nature journal article supplement (doi:10.1186/s42238-026-00391-2), 2026-01-16
Supplement: MOESM5 [file 42238_2026_391_MOESM5_ESM-1.pdf]

# CBDA

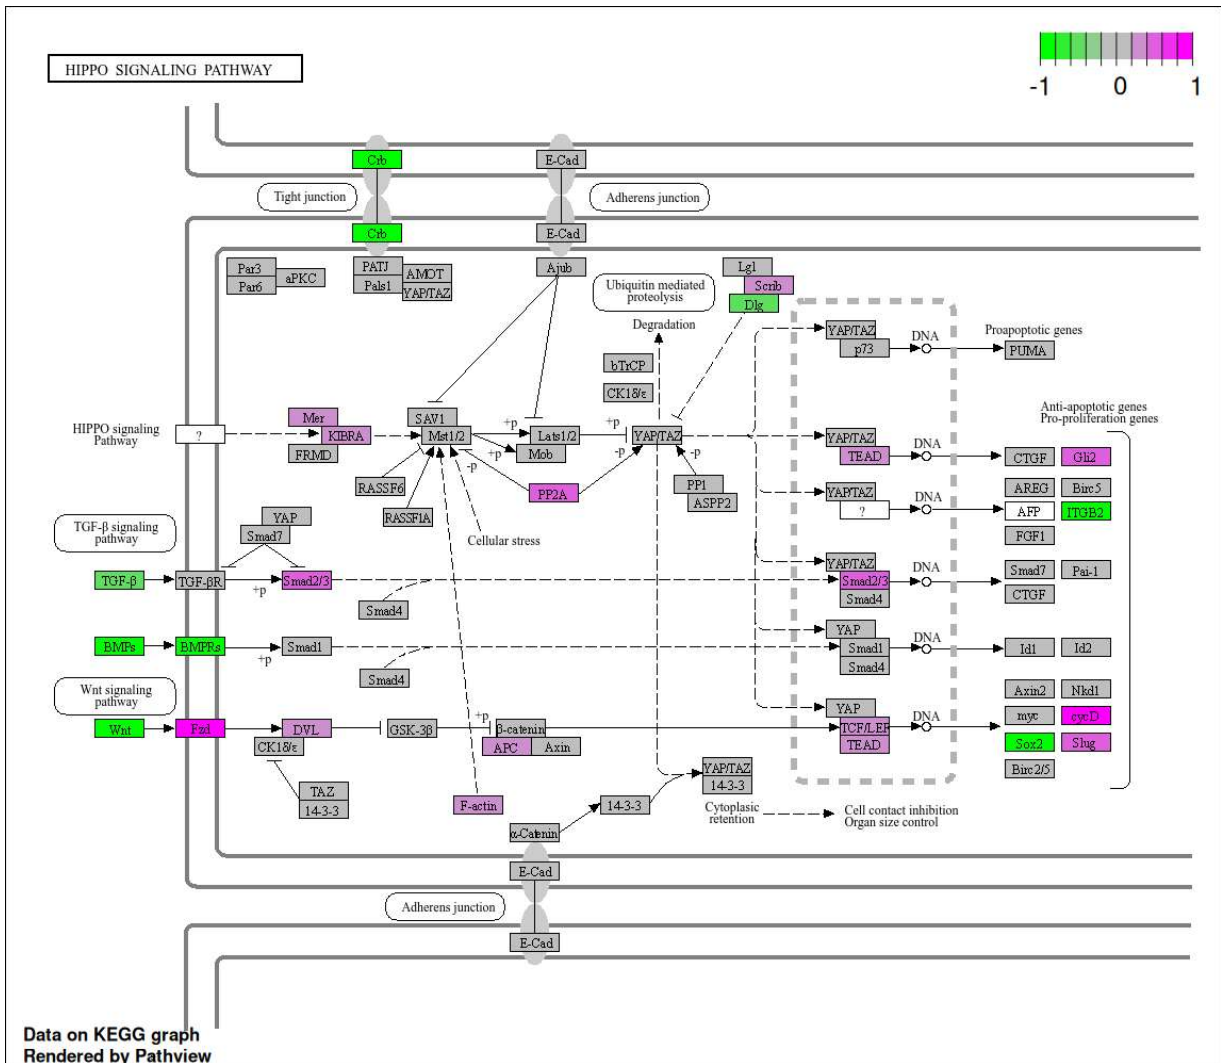

# CBD/CBDA (1:20)

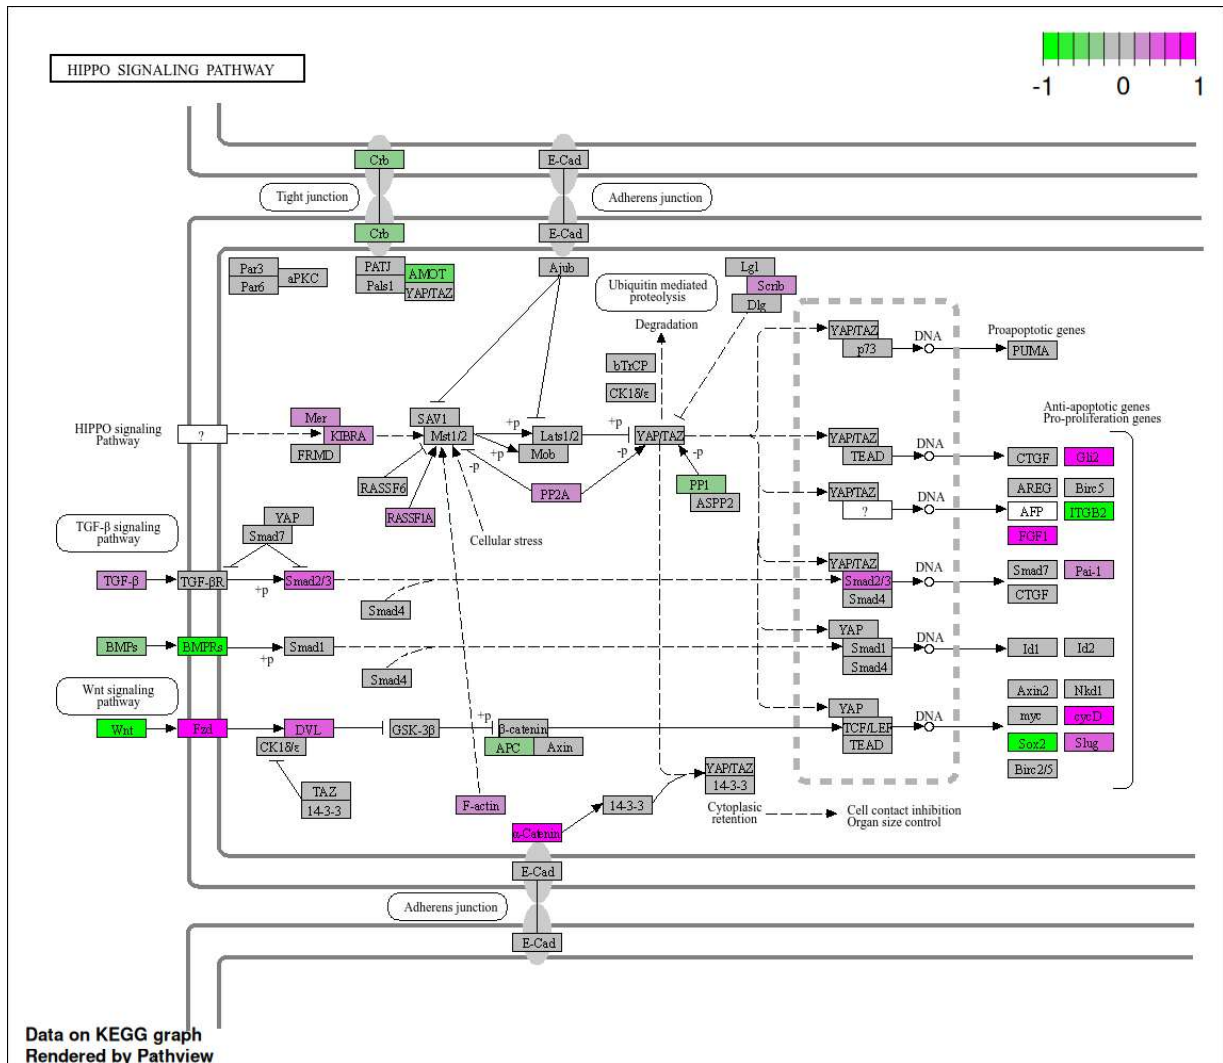

## C.s. extract

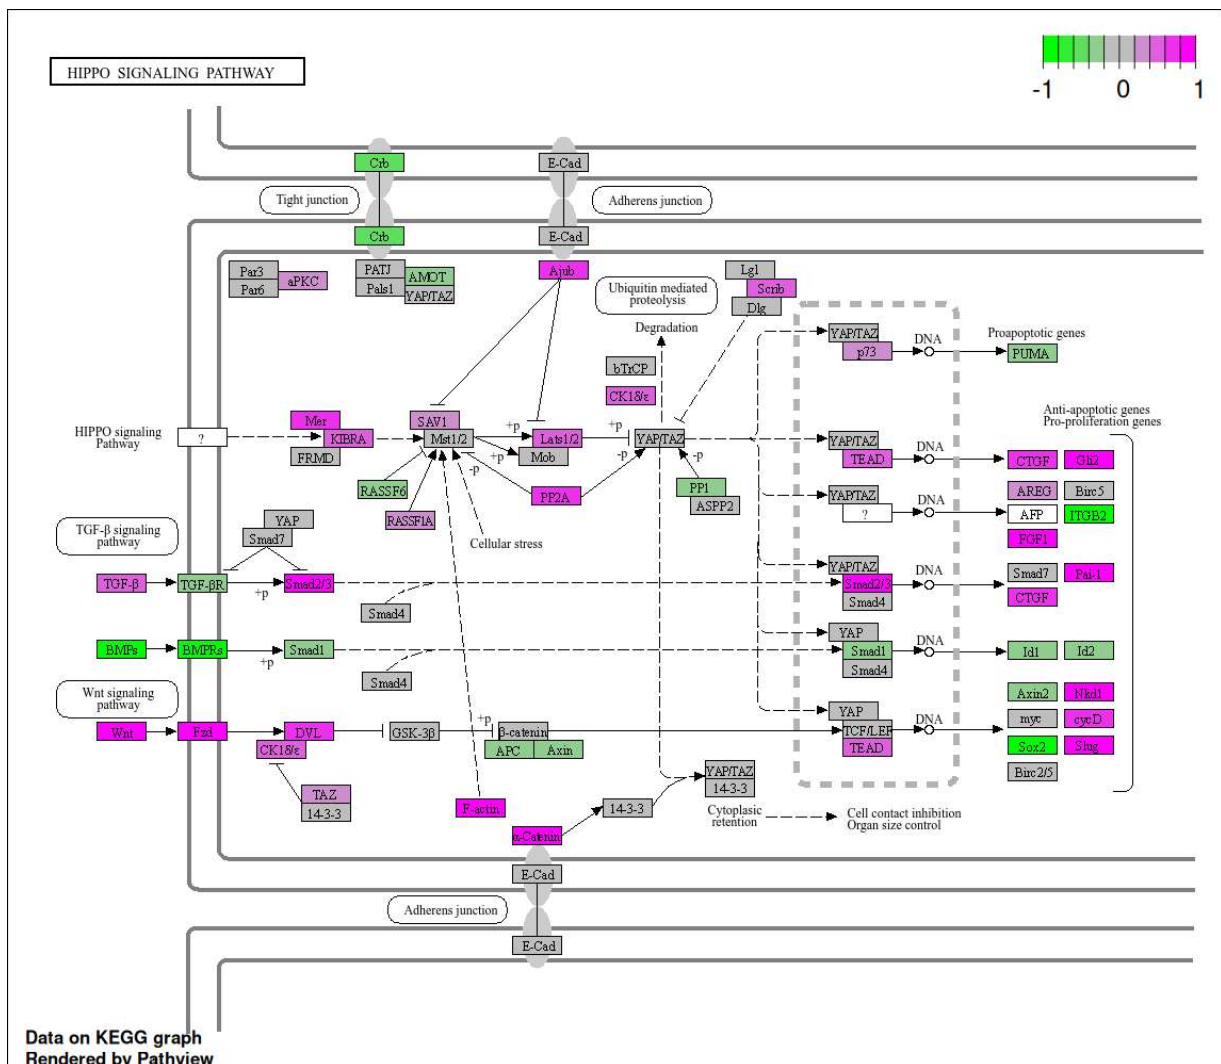

**Additional File 5** Hippo Signaling pathway in HCT116 cells treated with CBDA, CBD/CBDA (1:20), or C.s. extract. Gene expression changes within the Hippo signaling pathway in HCT116 cells following treatment with 10  $\mu$ M CBDA, CBD/CBDA (1:20), or C.s. extract compared to control. Magenta indicates upregulated genes, while green indicates downregulated genes.
