# Supplementary material for: The differential effects of CBD and CBDA on viability and mRNA expression in colorectal cancer cells
Source: J Cannabis Res. 2026 Jan 16;8:24. doi: 10.1186/s42238-026-00391-2 (PMC12895959; doi:10.1186/s42238-026-00391-2)
Supplement: Supplementary file 2 — Additional file 2. [file 42238_2026_391_MOESM2_ESM.xlsx]

## Sheet: HCT116
Differentially expressed genes
cutoff: (FDR) corrected p-values < 0.05 and log2 fold change (FC) > |1.0|.
CBD				CBDA				CBD/CBDA (1:20)				C.s. extract
Name	Log₂ fold change	FDR p-value		Name	Log₂ fold change	FDR p-value		Name	Log₂ fold change	FDR p-value		Name	Log₂ fold change	FDR p-value
TEN1-CDK3	-7.82717	0.0265072		TNFSF18	-1.01634	0.00240167		TNFSF18	-1.11408	0.000156001		SPECC1L-ADORA2A	-6.90655	0.00110977
gene:ENSG00000266997	-7.80849	0.0289937		ARRDC4	-1.04211	0.00240167		ARRDC4	-1.02232	0.00203558		gene:ENSG00000289685	-3.06511	0.003953
INHBE	-5.2471	0.00571394		ANGPTL4	1.23043	0.0360505		CPA4	1.04512	1.03934e-06		SPX	-2.39231	0.000908347
ANKRD62	-4.2416	0.0023055						KRT7	1.0697	2.91636e-08		H2AC7	-2.01067	0.000695088
PLGLB2	-3.67058	0.000958709						ANGPTL4	1.25955	0.0149229		POC1B-GALNT4	-1.77332	0.0475993
TNFRSF9	-3.65266	0.00422118						CYP1A1	1.6607	0.0001654		H4C5	-1.66062	0.0322555
CALCB	-3.18178	0.0145705						NRP2	1.92233	0.0224811		ABCA12	-1.65099	0.0137624
RDH12	-3.14117	0.038777										TMT1A	-1.6481	0.0102313
AZGP1	-3.1164	0.0124367										KLRC4-KLRK1	-1.51214	0.017887
gene:ENSG00000286231	-3.07664	0.0325317										LONRF2	-1.47376	7.63219e-05
MTTP	-3.04415	0.0186843										MMP7	-1.3361	0.0235835
NUPR1	-3.03091	0.00108616										SELENOP	-1.30592	0.000141901
H2BC13	-2.97279	0.0462057										EPHA7	-1.26189	0.0407222
H4C8	-2.95139	0.0194685										ARRDC4	-1.14986	1.7965e-05
SPX	-2.81225	2.70901e-05										CALCRL	-1.06331	0.00371084
AMT	-2.69165	0.0199325										SERPINI1	-1.03699	0.00162652
EDAR	-2.51305	0.00533204										CSTA	-1.00602	0.0409835
H4C4	-2.48016	0.0174557										ALS2CL	1.02022	0.00529461
TMT1A	-2.44011	2.00306e-05										GDA	1.02395	5.2141e-14
gene:ENSG00000279117	-2.42429	0.0487974										EMP1	1.02438	3.88707e-12
ARRDC4	-2.41623	1.43533e-25										GCOM1	1.03488	0.000265943
H2BC14	-2.40018	0.00619678										SERPINE1	1.05847	5.19794e-07
CHAC1	-2.3994	1.21695e-11										KRT15	1.06488	5.2141e-14
gene:ENSG00000286239	-2.38286	0.0149819										HAS3	1.07041	7.33859e-14
TSLP	-2.32854	0.00974577										OR2A7	1.08546	0.00487326
GALNT4	-2.25665	0.000740934										SLC37A2	1.09841	0.00450087
KLRC4-KLRK1	-2.24034	1.85044e-05										KRT80	1.12334	2.44779e-06
SGIP1	-2.14609	0.0423919										ADGRF1	1.13083	1.32298e-20
HSPA1A	-2.07835	0.0374426										TIPARP	1.13242	1.05007e-18
RERG	-2.03441	0.00831083										MGLL	1.13322	2.28848e-06
IL21R	-2.00699	0.0119975										BCAR3	1.15668	2.01625e-20
H4C1	-1.99584	0.00504251										gene:ENSG00000268400	1.15782	0.0269875
RIBC1	-1.97345	0.0162807										ETS1	1.17108	4.9664e-10
ELF5	-1.96472	0.0466015										F3	1.19652	4.95753e-16
EFCAB6	-1.88057	0.0246821										SEMA7A	1.23003	2.32722e-09
CACNA2D1	-1.74152	0.0466015										KRT7	1.23295	1.55584e-12
ZNF546	-1.74108	0.0246821										FOSL1	1.23457	6.21387e-19
NPR3	-1.74028	0.00463109										ALDH1A3	1.26686	2.988e-22
H2BC7	-1.73418	0.00854436										TACSTD2	1.37324	4.78527e-06
H4C3	-1.72714	0.0144677										KRTAP2-3	1.43514	4.13548e-12
NCAM1	-1.72614	0.0372882										NRP2	1.70199	0.014382
H3C12	-1.72081	0.0325564										C1orf116	1.73612	5.2141e-14
H4C2	-1.71737	0.0169696										GALNT5	1.94353	4.99905e-18
PLPPR4	-1.70403	0.00640644										KRTAP2-4	1.94471	0.010372
ID4	-1.70167	0.00891674										CPA4	1.96326	4.89718e-28
PTGS2	-1.69548	0.0250897										CYP1A1	2.16693	1.5112e-09
LONRF2	-1.68957	9.55877e-07										MYPN	2.22309	0.000128334
H2AC14	-1.66385	0.00337004										KRT34	3.52501	7.2106e-05
IL20RB	-1.65212	0.00283643										gene:ENSG00000285304	3.56657	0.000281027
H3C2	-1.6384	0.0223344
ZCCHC12	-1.63447	0.000547914
ARID5B	-1.62864	3.19069e-14
EFCC1	-1.5749	0.0162789
HTR1B	-1.54381	0.0186147
PCK2	-1.53486	1.87929e-08
MEIOSIN	-1.52599	0.00712435
CSTA	-1.48698	8.90608e-05
CCDC103	-1.48158	0.00712435
CRPPA	-1.46021	9.30147e-09
TLR1	-1.42508	0.00712269
GPR15	-1.42139	0.00048469
gene:ENSG00000255641	-1.40743	0.000512557
PBX1	-1.40633	2.73968e-14
HLA-DRA	-1.35382	0.00968238
IFITM1	-1.3436	0.0395424
DHRS2	-1.33667	9.90556e-08
MMP7	-1.33523	0.00963191
DNAI7	-1.33437	0.0485759
EPHA7	-1.32669	0.011049
H2BC11	-1.31141	0.00440518
gene:ENSG00000280129	-1.29939	0.0264407
TRIB3	-1.29727	2.15799e-08
SLC7A11	-1.28891	4.97326e-09
CYRIA	-1.28382	0.0119975
NLRP4	-1.28246	0.010352
RHOU	-1.27527	0.000101145
H2BC4	-1.27043	0.00182566
gene:ENSG00000279692	-1.26779	0.0444699
CEMIP	-1.26112	0.0167114
SLC1A4	-1.25595	1.11676e-05
TSC22D3	-1.24989	0.000159699
SAMD15	-1.23935	0.0450205
CALCRL	-1.2366	0.000123977
TMEM154	-1.22678	0.00306122
ETV1	-1.20371	4.37175e-15
H2AC11	-1.20239	0.0255439
ODAD4	-1.20003	0.029468
H2AC7	-1.19955	0.047097
DDIT4	-1.19182	0.00939646
H3C10	-1.18775	0.0423014
IKZF2	-1.18465	0.014515
PSAT1	-1.18044	1.49389e-16
INO80B-WBP1	-1.17916	0.0422771
NICN1	-1.17912	0.0441367
SERPINI1	-1.16047	8.8589e-05
H2BC17	-1.15976	0.00957629
ALDH1L2	-1.14581	0.0105746
DDIT3	-1.14273	0.00130565
STAT4	-1.13762	0.0100753
ASNS	-1.12319	4.96787e-06
MDH1B	-1.11842	0.000277633
SELENOP	-1.11157	0.000896564
LIAT1	-1.10082	0.0329938
LRRIQ1	-1.07528	0.00712269
IFIT1	-1.06899	0.000450516
H2AC17	-1.03613	0.000897958
HKDC1	-1.03421	0.0380403
ANXA9	-1.01351	0.0313075
SPOCK3	-1.00951	0.0268953
FAM167A	-1.00215	0.00342957
MYL2	1.002	0.0027251
AGPAT4	1.00406	8.84614e-05
AXL	1.00962	1.74272e-14
NAV3	1.0265	2.85881e-10
GBP3	1.03562	0.0331246
TMED7-TICAM2	1.03584	4.84564e-07
ELK3	1.04403	9.39561e-20
ARID3B	1.04441	4.4198e-06
NT5E	1.04464	2.90467e-17
DNAH5	1.04688	0.0483297
LTBP2	1.04884	0.022064
IFFO2	1.0628	4.81393e-12
ANGPTL4	1.06283	0.00706719
ARTN	1.06442	1.22394e-06
FOXD1	1.06823	0.000257299
OR2A7	1.06906	0.00248158
GAS6	1.08393	2.55571e-09
ABTB3	1.08663	7.22484e-09
MYRIP	1.08949	0.0408932
PROSER2	1.09305	3.12412e-18
ALS2CL	1.10743	0.000696401
DCLK1	1.11361	2.22622e-08
TIPARP	1.12638	7.56236e-19
LAMB3	1.14549	2.99183e-08
CCN2	1.15555	0.000333837
C11orf68	1.15648	3.83027e-14
KRT15	1.20005	1.93731e-18
CYP1A1	1.20507	0.00349119
SEMA6A	1.2062	1.5024e-09
WNT9A	1.21929	0.00121924
VCAN	1.21977	1.67198e-20
GDA	1.22423	1.07282e-20
WNT7B	1.22777	3.15368e-05
DUSP5	1.25471	3.71205e-20
GJB3	1.26111	6.59542e-17
ADGRF1	1.2615	2.01255e-26
ALDH1A3	1.27456	3.75172e-23
KRT7	1.28536	4.07477e-14
SIPA1L3	1.29142	9.48345e-13
CD68	1.30827	7.61142e-07
MGLL	1.3488	9.49493e-10
TACSTD2	1.34958	3.36349e-06
CST6	1.391	4.73889e-15
gene:ENSG00000287839	1.4033	2.79725e-05
EMP1	1.4158	3.66594e-24
MDGA1	1.43927	0.00832125
ADAMTS16	1.45973	0.00248891
KRT80	1.51086	2.09713e-12
ETS1	1.54167	1.60131e-18
SEMA7A	1.56367	3.18096e-16
F3	1.56542	2.08152e-28
BCAR3	1.60036	4.95274e-41
FOSL1	1.60622	4.30904e-33
KRTAP2-3	1.62209	4.43832e-16
NRP2	1.66032	0.00759204
WNT7A	1.67383	0.0144786
KRT39	1.81546	0.0460238
DAPP1	1.83004	0.0153412
GALNT5	1.93815	2.72326e-18
C1orf116	2.0394	3.71205e-20
SERPINE1	2.1122	6.45216e-31
KLK5	2.18279	2.43164e-05
SERPINB7	2.26382	0.00180569
TNNT2	2.30251	0.0177299
KRTAP2-4	2.30736	0.00032702
FGF1	2.34034	0.0383033
gene:ENSG00000260170	2.34274	0.00053143
PRR4	2.36231	0.0305222
MYPN	2.45877	3.34253e-06
CPA4	2.56868	5.61125e-50
gene:ENSG00000285304	3.06536	0.00154135
KRT34	3.82212	3.05131e-06

## Sheet: DLD1
Differentially expressed genes
cutoff: (FDR) corrected p-values < 0.05 and log2 fold change (FC) > |1.0|.
CBD				CBDA				CBD/CBDA (1:20)				C.s. extract
Name	Log₂ fold change	FDR p-value		Name	Log₂ fold change	FDR p-value		Name	Log₂ fold change	FDR p-value		Name	Log₂ fold change	FDR p-value
GOLGA8T	-3.19996	0.00154011		S100P	1.0015	0.00105236		H4C13	-1.9228	0.0486673		SLC2A12	1.04225	5.90908e-05
H3C4	-2.90872	7.24647e-05		PDK4	1.00228	0.00257538		H2AC13	-1.88769	0.00785894		ALDH1A3	1.07754	5.27768e-05
gene:ENSG00000283321	-2.82076	0.0486624		DHRS3	1.13614	0.0133297		REG4	-1.30116	0.00211279		TRIM31	1.08295	0.000250299
H3C12	-2.66864	8.35813e-05		AOAH	1.15083	0.0164702		DAPK2	1.05226	0.0155241		DAPK2	1.08801	0.00650763
H3C7	-2.62717	0.00513834		UGT1A1	1.15219	5.88759e-05		PDK4	1.05931	0.000663111		FGD2	1.15053	0.000371732
H2AC14	-2.31885	0.000498951		PRSS1	1.31941	0.0133297		DHRS3	1.15263	0.00785894		ADGRF1	1.36417	0.0167171
gene:ENSG00000279741	-2.27821	0.0415342		CYP1A1	2.14695	2.77204e-10		UGT1A1	1.37223	6.29977e-08		DHRS3	1.63988	6.88919e-07
H2BC7	-2.16703	0.000462355		ANGPTL4	3.0764	2.82668e-29		AHRR	1.8359	0.0485502		UGT1A1	1.92257	2.05002e-17
H2AC7	-2.11041	0.000780277		RIMBP3B	5.10172	0.0114002		CYP1A1	2.75052	1.70189e-18		ANGPTL4	2.25215	2.40504e-14
MDH1B	-2.03025	0.0201088		gene:ENSG00000285238	5.96365	2.77204e-10		ANGPTL4	2.9871	2.05307e-27		AHRR	2.368	0.000438757
H3C11	-2.01699	0.00318412						gene:ENSG00000285238	5.33711	6.29977e-08		gene:ENSG00000283149	3.48082	0.0354111
H2BC13	-1.88199	0.016226										gene:ENSG00000285238	4.4793	2.79726e-05
H2AC4	-1.88074	0.0391782										RIMBP3B	4.57766	0.0277306
H4C1	-1.86383	0.0109389										CYP1A1	4.73178	1.21522e-59
H2BC17	-1.80018	0.000461302
H3C14	-1.79874	0.00877632
H4C9	-1.75242	0.0344855
H2AC13	-1.72347	0.00226039
H3C13	-1.66308	0.0164282
H2BC11	-1.62811	0.000362935
H3C2	-1.60354	0.00122617
H1-3	-1.58981	0.00699339
H4C13	-1.5875	0.0230218
PRADC1	-1.57458	6.16673e-08
H1-5	-1.55232	0.00275123
H2AC11	-1.54139	0.00190706
H2BC18	-1.5203	1.0431e-05
H2AC12	-1.49303	0.0164558
H4C14	-1.49122	0.0166777
CDH7	-1.47306	0.0399048
H2BC4	-1.39589	0.0012186
gene:ENSG00000259529	-1.39514	0.0348262
KBTBD8	-1.36351	3.49788e-05
KLHL13	-1.24378	0.0432938
BICC1	-1.23753	0.0330338
TPRG1	-1.1963	0.00718901
H1-4	-1.18809	5.55522e-06
TEX9	-1.18506	0.00338844
RIBC2	-1.17973	0.000854593
FAM111B	-1.17624	1.30331e-07
NOX1	-1.16133	0.000648218
H2AC17	-1.146	0.00110622
BRME1	-1.13901	0.000814545
C1orf105	-1.13686	0.0344855
gene:ENSG00000272896	-1.11305	0.0118525
CENPS-CORT	-1.10881	0.0153243
CCNE2	-1.10182	2.34009e-05
RUBCNL	-1.09425	0.0438741
ACTRT3	-1.07121	0.0254675
ODAM	-1.03525	0.00149561
GINS2	-1.02873	4.44085e-07
CRPPA	-1.0235	0.0237602
ERP27	-1.00743	0.00970866
COL13A1	1.01373	0.047217
EMP1	1.01404	6.58545e-06
PDK4	1.02034	0.000113118
FBXO32	1.0292	1.0431e-05
KRT15	1.03448	0.00959585
PER1	1.0348	0.0199497
MYLK	1.03502	0.000128025
HBEGF	1.038	4.3683e-05
AOAH	1.0418	0.00449109
SQSTM1	1.04627	4.98404e-14
SLC7A11	1.04846	4.66174e-09
VSIR	1.04954	0.000166066
TGFBI	1.05533	2.17962e-14
CDYL2	1.07496	0.00232609
GPX2	1.07545	0.024478
EDAR	1.07921	0.00247077
RNF39	1.09129	0.000158661
SEC24D	1.09151	2.26003e-06
CLIP2	1.09491	1.82913e-05
ALDH1A3	1.09884	6.20941e-06
MT2A	1.10442	1.55749e-06
GPRC5A	1.10918	4.8777e-15
TIPARP	1.11471	2.27596e-10
REPS2	1.11674	0.000177119
MXD1	1.11942	6.25534e-09
MYZAP	1.12074	1.71611e-09
BEST1	1.12345	0.00110622
TRIM31	1.12837	1.71823e-05
FTH1	1.13988	4.38014e-09
TMCC3	1.14158	0.000117538
TAS2R20	1.1433	0.0319374
BHLHE41	1.15828	0.0455402
OSGIN1	1.16199	0.00742716
ABCC3	1.1669	4.71317e-11
AHNAK2	1.17778	0.000380146
BEAN1	1.20722	0.0146114
IL6R	1.24784	4.01019e-09
PIK3CD	1.2495	0.034252
PRKCG	1.28775	0.0117719
ELF3	1.2892	7.78172e-11
PKD1L2	1.29678	0.000997266
PDE2A	1.31698	0.00224264
HSPA5	1.33793	1.23674e-17
CYP4F3	1.34941	0.00216732
DAPK2	1.35355	1.0431e-05
PTPRH	1.35536	0.0101346
HCN2	1.36549	0.0113657
CITED4	1.37344	0.034252
GDF15	1.43522	1.11583e-15
SLC2A12	1.44398	4.31164e-11
FGD5	1.44618	0.0344855
CDKN2B	1.45127	0.0115152
VPS37D	1.45943	0.0358149
MCTP1	1.46767	0.0156932
CACNG6	1.47311	0.0155852
ABCA4	1.49887	0.0331728
CD68	1.52211	0.000997266
BHLHE40	1.57963	2.17962e-14
JMJD7-PLA2G4B	1.5875	0.00877632
SLC5A1	1.62723	0.00176197
PADI1	1.65727	4.50546e-06
CD22	1.67812	4.23908e-05
UGT1A1	1.70618	6.26251e-14
NEURL3	1.90596	0.000419505
JAKMIP3	1.90715	0.0121433
SERPINE1	1.93656	1.05088e-05
DUSP5	1.93927	1.00145e-25
ITGAX	2.01168	0.0319669
CEACAM1	2.02803	5.85893e-05
PSG9	2.10747	0.0301748
AHRR	2.11447	0.000653025
FAXDC2	2.14239	8.72592e-05
DHRS3	2.18695	2.17962e-14
CSF2	2.22332	0.0019604
ANGPTL4	2.26167	8.23816e-15
FGF19	2.34445	0.00244167
gene:ENSG00000284461	3.15305	0.0018976
SPOCD1	3.1594	3.5665e-05
CYP1A1	3.48884	4.80442e-31
RIMBP3B	4.98396	0.000970729
CORO7-PAM16	7.82345	0.0266324
