# Supplementary material for: The differential effects of CBD and CBDA on viability and mRNA expression in colorectal cancer cells
Source: J Cannabis Res. 2026 Jan 16;8:24. doi: 10.1186/s42238-026-00391-2 (PMC12895959; doi:10.1186/s42238-026-00391-2)
Supplement: Supplementary file 3 — Additional file 3. [file 42238_2026_391_MOESM3_ESM.xlsx]

## Sheet: HCT116 CBD
Upregulated biological processes of HCT116 cells treated with CBD
TermID	Name	Enrichment FDR	nGenes	Pathway Genes	Fold Enrichment
GO:0009888	tissue development	1.03782e-10	33	2086	4.29535
GO:0045109	intermediate filament organization	9.05941e-06	6	77	37.134
GO:0048731	system development	3.66943e-05	38	4617	2.24121
GO:0045103	intermediate filament-based process	5.57619e-05	6	100	22.5716
GO:0040011	locomotion	6.69127e-05	23	1992	3.18381
GO:0006935	chemotaxis	9.90257e-05	12	672	5.81391
GO:0050920	regulation of chemotaxis	9.90257e-05	8	241	10.4413
GO:0016477	cell migration	0.00033804	19	1602	3.20891
GO:0048514	blood vessel morphogenesis	0.00033804	12	647	5.03787
GO:0048870	cell motility	0.000352159	20	1806	3.02617
GO:0051674	localization of cell	0.000352159	20	1806	3.02617
GO:0048846	axon extension involved in axon guidance	0.000857702	4	38	26.4633
GO:0001525	angiogenesis	0.00172762	10	555	4.91946
GO:0007411	axon guidance	0.0017517	7	245	7.67436
GO:0097485	neuron projection guidance	0.0017676	7	246	7.63075
GO:0071526	semaphorin-plexin signaling pathway	0.00193189	4	45	20.1957
GO:0097435	supramolecular fiber organization	0.00193189	13	883	3.66251
GO:0032989	cellular anatomical entity morphogenesis	0.00217663	12	789	3.87594
GO:0007409	axonogenesis	0.00224161	9	452	5.15442
GO:0070371	ERK1 and ERK2 cascade	0.00396018	7	361	6.21765
GO:0061564	axon development	0.00409979	9	501	4.60462
GO:0042221	response to chemical	0.00411998	30	4821	1.90968
GO:2000352	negative regulation of endothelial cell apoptotic process	0.00411998	3	31	28.7788
GO:0040012	regulation of locomotion	0.0057048	13	1085	3.13338
GO:0048812	neuron projection morphogenesis	0.0057048	10	647	3.91549
GO:0009605	response to external stimulus	0.00576483	22	3073	2.19838
GO:0022008	neurogenesis	0.00624105	17	1757	2.54217
GO:0010934	macrophage cytokine production	0.00748874	3	46	21.3177
GO:0010935	regulation of macrophage cytokine production	0.00748874	3	46	21.3177
GO:0048667	cell morphogenesis involved in neuron differentiation	0.00834875	9	585	3.93333
GO:0009611	response to wounding	0.00948492	9	619	3.8202
GO:0014031	mesenchymal cell development	0.00948492	4	89	10.5128
GO:0032536	regulation of cell projection size	0.00948492	2	13	54.8168
GO:0048699	generation of neurons	0.00948492	15	1522	2.57875
GO:0097048	dendritic cell apoptotic process	0.00948492	2	14	54.8168
GO:0001655	urogenital system development	0.0116098	7	373	4.6471
GO:0007010	cytoskeleton organization	0.0120042	16	1594	2.3945
GO:1990138	neuron projection extension	0.0122752	5	180	6.80351
GO:0072577	endothelial cell apoptotic process	0.0124427	3	70	15.9882
GO:0016102	diterpenoid biosynthetic process	0.013128	2	11	42.6353
GO:0098743	cell aggregation	0.013128	2	23	42.6353
GO:0035457	cellular response to interferon-alpha	0.0156331	2	25	38.3718
GO:0006954	inflammatory response	0.0174661	9	892	3.37912
GO:0007399	nervous system development	0.0174661	20	2618	2.02811
GO:0007155	cell adhesion	0.0177827	14	1729	2.45973
GO:0031175	neuron projection development	0.021926	11	1001	2.7916
GO:0051239	regulation of multicellular organismal process	0.0220181	21	3024	1.93332
GO:0030030	cell projection organization	0.0221144	15	1606	2.2968
GO:0042060	wound healing	0.0251129	7	475	3.87035
GO:0010628	positive regulation of gene expression	0.0266625	12	1312	2.54399
GO:0009125	nucleoside monophosphate catabolic process	0.0295623	2	19	25.5812
GO:0065008	regulation of biological quality	0.0310581	26	4103	1.70308
GO:0001895	retina homeostasis	0.0314997	3	82	10.465
GO:0071300	cellular response to retinoic acid	0.0314997	3	72	10.465
GO:0030182	neuron differentiation	0.0328063	13	1449	2.34856
GO:0001779	natural killer cell differentiation	0.035058	2	26	22.5716
GO:0007420	brain development	0.0407	9	816	2.8447
GO:0031589	cell-substrate adhesion	0.0461334	6	385	3.79919
GO:0048666	neuron development	0.0477755	11	1169	2.43139
GO:0042278	purine nucleoside metabolic process	0.0478558	2	29	18.2723
GO:0071363	cellular response to growth factor stimulus	0.0478558	8	697	2.98033
GO:1905606	regulation of presynapse assembly	0.0478558	2	35	18.2723
Downregulated biological processes of HCT116 cells treated with CBD
TermID	Name	Enrichment FDR	nGenes	Pathway Genes	Fold Enrichment
GO:0061644	protein localization to CENP-A containing chromatin	5.73129e-26	15	18	98.9749
GO:0045653	negative regulation of megakaryocyte differentiation	3.18752e-24	14	18	97.8105
GO:0006334	nucleosome assembly	5.3763e-24	23	137	26.5214
GO:0030219	megakaryocyte differentiation	4.64942e-16	14	69	33.2556
GO:0002469	myeloid dendritic cell antigen processing and presentation	2.12311e-14	8	11	105.573
GO:0034502	protein localization to chromosome	3.28433e-12	15	121	15.4917
GO:0090715	immunological memory formation process	9.21669e-12	8	21	63.3439
GO:0090713	immunological memory process	1.77137e-11	8	25	59.3849
GO:0002520	immune system development	1.30183e-10	30	1108	4.51025
GO:0043933	protein-containing complex organization	5.92123e-10	43	2069	3.01304
GO:0006352	DNA-templated transcription initiation	1.7346e-09	14	174	11.0852
GO:0002376	immune system process	2.40029e-09	46	3183	2.73034
GO:0002682	regulation of immune system process	4.61659e-09	33	1735	3.54697
GO:0006325	chromatin organization	9.20801e-09	24	701	4.71933
GO:0032200	telomere organization	4.21378e-08	14	199	8.52707
GO:0032075	positive regulation of nuclease activity	5.79008e-07	5	11	53.9863
GO:0070434	positive regulation of nucleotide-binding oligomerization domain containing 2 signaling pathway	5.79008e-07	5	13	53.9863
GO:0032757	positive regulation of interleukin-8 production	1.31626e-06	7	85	20.2778
GO:0070370	cellular heat acclimation	1.31626e-06	5	13	45.6807
GO:0002399	MHC class II protein complex assembly	1.81663e-06	8	81	14.6178
GO:0070059	intrinsic apoptotic signaling pathway in response to endoplasmic reticulum stress	3.54457e-06	8	73	13.3825
GO:0002396	MHC protein complex assembly	3.87075e-06	8	89	13.1966
GO:0090063	positive regulation of microtubule nucleation	3.93992e-06	5	16	37.1156
GO:0051239	regulation of multicellular organismal process	5.25221e-06	40	3024	2.27965
GO:1901029	negative regulation of mitochondrial outer membrane permeabilization involved in apoptotic signaling pathway	5.25221e-06	5	19	34.9323
GO:1903265	positive regulation of tumor necrosis factor-mediated signaling pathway	6.79424e-06	5	20	32.9916
GO:0032637	interleukin-8 production	7.92028e-06	7	107	15.1162
GO:0031341	regulation of cell killing	8.27684e-06	8	165	11.7304
GO:0001906	cell killing	1.69502e-05	9	277	8.76171
GO:0050793	regulation of developmental process	1.79567e-05	37	2680	2.26054
GO:0090083	regulation of inclusion body assembly	2.6578e-05	5	25	24.7437
GO:0032069	regulation of nuclease activity	3.22135e-05	5	26	23.754
GO:0051131	chaperone-mediated protein complex assembly	4.6097e-05	5	31	21.9944
GO:0050890	cognition	5.75912e-05	11	347	5.73012
GO:0051276	chromosome organization	7.92957e-05	24	1173	2.74612
GO:0070841	inclusion body assembly	9.91565e-05	5	37	18.5578
GO:0042026	protein refolding	0.000113772	5	35	17.9954
GO:1901800	positive regulation of proteasomal protein catabolic process	0.000950432	7	136	6.70475
GO:0019221	cytokine-mediated signaling pathway	0.00118995	11	569	3.95899
GO:0038034	signal transduction in absence of ligand	0.00179275	5	85	9.57821
GO:0071383	cellular response to steroid hormone stimulus	0.00180347	8	233	5.10838
GO:0008285	negative regulation of cell population proliferation	0.00209992	14	772	3.03981
GO:0060759	regulation of response to cytokine stimulus	0.00243487	7	185	5.65571
GO:0042592	homeostatic process	0.00253503	24	1916	2.1513
GO:0090559	regulation of membrane permeability	0.00261591	5	80	8.73308
GO:0002753	cytoplasmic pattern recognition receptor signaling pathway	0.00277709	5	76	8.60651
GO:0034620	cellular response to unfolded protein	0.00379195	6	121	6.25104
GO:0030308	negative regulation of cell growth	0.00409955	7	199	5.13203
GO:0034976	response to endoplasmic reticulum stress	0.00427688	9	291	3.95899
GO:0019058	viral life cycle	0.00575366	9	367	3.79053
GO:0035966	response to topologically incorrect protein	0.00821156	7	195	4.51842
GO:0031397	negative regulation of protein ubiquitination	0.00841281	5	94	6.59832
GO:0006090	pyruvate metabolic process	0.00877467	5	114	6.52582
GO:0048872	homeostasis of number of cells	0.00943024	8	327	3.8782
GO:0006839	mitochondrial transport	0.0101215	7	205	4.33015
GO:0044419	biological process involved in interspecies interaction between organisms	0.012234	20	1917	2.06377
GO:0007159	leukocyte cell-cell adhesion	0.0160533	9	525	3.21
GO:0048659	smooth muscle cell proliferation	0.0164478	5	160	5.54999
GO:0002221	pattern recognition receptor signaling pathway	0.0170805	6	218	4.51025
GO:0042127	regulation of cell population proliferation	0.0177304	21	1835	1.94705
GO:0009069	serine family amino acid metabolic process	0.0185364	3	43	11.1347
GO:0046034	ATP metabolic process	0.0189575	8	318	3.40559
GO:0043648	dicarboxylic acid metabolic process	0.0300359	4	98	6.09076
GO:0007041	lysosomal transport	0.0306242	5	139	4.67598
GO:0032488	Cdc42 protein signal transduction	0.0306242	2	16	19.795
GO:0006979	response to oxidative stress	0.0328955	9	476	2.82039
GO:0042221	response to chemical	0.0328955	38	4821	1.49743
GO:0016032	viral process	0.0343959	9	478	2.79824
GO:0006071	glycerol metabolic process	0.0349062	2	21	18.2723
GO:0060287	epithelial cilium movement involved in determination of left/right asymmetry	0.0349062	2	13	18.2723
GO:0006750	glutathione biosynthetic process	0.0395048	2	15	16.9671
GO:0070365	hepatocyte differentiation	0.0395048	2	17	16.9671

## Sheet: HCT116 C.s. extract
Upregulated biological processes of HCT116 cells treated with C.s. extract
TermID	Name	Enrichment FDR	nGenes	Pathway Genes	Fold Enrichment
GO:0045109	intermediate filament organization	0.000422074	4	77	63.7619
GO:0045103	intermediate filament-based process	0.00173197	4	100	34.7792
GO:0009888	tissue development	0.00320898	13	2086	3.82866
GO:0006935	chemotaxis	0.00331365	7	672	8.1896
GO:0048846	axon extension involved in axon guidance	0.00536847	3	38	42.5079
GO:0071526	semaphorin-plexin signaling pathway	0.00737198	3	45	37.023
GO:0050727	regulation of inflammatory response	0.0151578	5	403	9.19643
GO:0016114	terpenoid biosynthetic process	0.0215152	2	18	58.8571
GO:0050877	nervous system process	0.0215152	7	1730	4.85145
GO:0006954	inflammatory response	0.0273034	6	892	5.33821
GO:0042445	hormone metabolic process	0.0298307	3	162	14.7143
GO:0061081	positive regulation of myeloid leukocyte cytokine production involved in immune response	0.0332743	2	44	34.7792
GO:0010934	macrophage cytokine production	0.0335299	2	46	33.2671
GO:0120254	olefinic compound metabolic process	0.0335299	3	171	12.8957
GO:0007186	G protein-coupled receptor signaling pathway	0.0347145	5	1482	5.62605
GO:0040012	regulation of locomotion	0.0360796	7	1085	3.84218
GO:0019369	arachidonate metabolic process	0.0418068	2	60	27.3265
GO:0009605	response to external stimulus	0.0428223	11	3073	2.53359
