# Supplementary material for: The differential effects of CBD and CBDA on viability and mRNA expression in colorectal cancer cells
Source: J Cannabis Res. 2026 Jan 16;8:24. doi: 10.1186/s42238-026-00391-2 (PMC12895959; doi:10.1186/s42238-026-00391-2)
Supplement: Supplementary file 4 — Additional file 4. [file 42238_2026_391_MOESM4_ESM.xlsx]

## Sheet: DLD1 CBD
Upregulated biological processes of DLD1 cells treated with CBD
TermID	Name	Enrichment FDR	nGenes	Pathway Genes	Fold Enrichment
GO:0009605	response to external stimulus	6.03912e-06	33	3073	2.94569
GO:0006952	defense response	0.0064697	20	2031	2.93892
GO:0009607	response to biotic stimulus	0.0064697	19	1771	3.06591
GO:0051707	response to other organism	0.00879323	18	1728	2.98745
GO:0002376	immune system process	0.0218612	25	3183	2.14684
GO:0044419	biological process involved in interspecies interaction between organisms	0.0231503	18	1917	2.59353
GO:0015721	bile acid and bile salt transport	0.0236662	3	33	27.136
GO:0070887	cellular response to chemical stimulus	0.0236662	27	3300	2.02303
GO:0010565	regulation of cellular ketone metabolic process	0.0249719	5	130	9.25091
GO:0009888	tissue development	0.0253798	20	2086	2.35113
GO:0006720	isoprenoid metabolic process	0.0274908	5	134	8.75355
GO:0042445	hormone metabolic process	0.0274908	5	162	8.75355
GO:0001781	neutrophil apoptotic process	0.0306267	2	22	65.1264
GO:0033029	regulation of neutrophil apoptotic process	0.0306267	2	21	65.1264
GO:0042180	cellular ketone metabolic process	0.0306267	6	218	6.42695
GO:0097267	omega-hydroxylase P450 pathway	0.0306267	2	11	65.1264
GO:2000145	regulation of cell motility	0.0306267	13	1038	3.03239
GO:0040012	regulation of locomotion	0.0329597	13	1085	2.94792
GO:0120254	olefinic compound metabolic process	0.0329597	5	171	7.8277
GO:0051591	response to cAMP	0.0344506	4	92	10.6765
GO:0070633	transepithelial transport	0.0344506	3	34	18.7865
GO:0003008	system process	0.0395532	16	2507	2.44836
GO:0006955	immune response	0.0395532	17	2190	2.35965
GO:0043412	macromolecule modification	0.039877	34	4206	1.67496
GO:0097011	cellular response to granulocyte macrophage colony-stimulating factor stimulus	0.039877	2	23	46.5189
GO:0097012	response to granulocyte macrophage colony-stimulating factor	0.039877	2	23	46.5189
GO:0006954	inflammatory response	0.0404416	10	892	3.3364
GO:0016101	diterpenoid metabolic process	0.0431039	2	11	40.704
GO:0016567	protein ubiquitination	0.0431039	13	937	2.66912
GO:0031667	response to nutrient levels	0.0431039	8	481	3.87657
GO:0032060	bleb assembly	0.0431039	2	11	40.704
GO:0042221	response to chemical	0.0431039	30	4821	1.7327
GO:0007167	enzyme-linked receptor protein signaling pathway	0.0465065	12	1025	2.77134
Downregulated biological processes of HCT116 cells treated with CBD
TermID	Name	Enrichment FDR	nGenes	Pathway Genes	Fold Enrichment
GO:0006334	nucleosome assembly	4.42426e-38	26	137	57.4923
GO:0061644	protein localization to CENP-A containing chromatin	4.42426e-38	17	18	219.281
GO:0045653	negative regulation of megakaryocyte differentiation	3.94204e-29	14	18	180.585
GO:0034502	protein localization to chromosome	2.58202e-22	18	121	36.028
GO:0030219	megakaryocyte differentiation	8.07483e-20	14	69	54.1754
GO:0006325	chromatin organization	1.08803e-18	26	701	10.0779
GO:0051276	chromosome organization	2.90778e-17	30	1173	6.82214
GO:0006352	DNA-templated transcription initiation	3.82693e-14	14	174	22.1124
GO:0032200	telomere organization	5.74056e-14	15	199	18.2341
GO:0043933	protein-containing complex organization	4.47012e-11	29	2069	4.18213
GO:0002227	innate immune response in mucosa	1.04327e-10	6	34	116.09
GO:0002376	immune system process	0.000985179	20	3183	2.44916
GO:0002682	regulation of immune system process	0.0011151	14	1735	3.16199
GO:0006310	DNA recombination	0.00353424	7	348	5.38166
GO:0045910	negative regulation of DNA recombination	0.00695865	3	44	17.86
GO:0061982	meiosis I cell cycle process	0.00931703	4	150	9.38102

## Sheet: DLD1 CBDA
Upregulated biological processes of DLD1 cells treated with CBDA
TermID	Name	Enrichment FDR	nGenes	Pathway Genes	Fold Enrichment
GO:0006629	lipid metabolic process	0.0021581	6	1516	7.81199
GO:0006720	isoprenoid metabolic process	0.0021581	3	134	45.6133
GO:0009812	flavonoid metabolic process	0.0021581	2	16	210.523
GO:0042178	xenobiotic catabolic process	0.0021962	2	26	195.486
GO:0042445	hormone metabolic process	0.004991	3	266	28.3117
GO:0032787	monocarboxylic acid metabolic process	0.00573445	4	628	12.6704
GO:0042572	retinol metabolic process	0.00955785	2	64	73.9676
GO:0022617	extracellular matrix disassembly	0.0110152	2	73	66.7512
GO:0006778	porphyrin-containing compound metabolic process	0.014576	2	58	54.736
GO:0033013	tetrapyrrole metabolic process	0.0182587	2	71	46.3864
GO:0007586	digestion	0.0198178	2	141	43.4413
GO:0034308	primary alcohol metabolic process	0.022581	2	119	36.0105
GO:0031667	response to nutrient levels	0.0226127	3	481	12.6704
GO:0010565	regulation of cellular ketone metabolic process	0.0263254	2	130	31.4575
GO:0044281	small molecule metabolic process	0.0290086	5	1936	4.78796
GO:0007584	response to nutrient	0.0308882	2	158	27.6444
GO:0120254	olefinic compound metabolic process	0.0308882	2	171	27.9265
GO:0001889	liver development	0.0351222	2	142	25.1083
GO:0061008	hepaticobiliary system development	0.0351222	2	145	24.6559
GO:0005975	carbohydrate metabolic process	0.0405019	3	627	9.04229
GO:0006109	regulation of carbohydrate metabolic process	0.0465787	2	186	19.8319

## Sheet: DLD1 CBD+CBDA
Upregulated biological processes of DLD1 cells treated with CBD/CBDA (1:20)
TermID	Name	Enrichment FDR	nGenes	Pathway Genes	Fold Enrichment
GO:0006805	xenobiotic metabolic process	0.000500157	3	118	86.3896
GO:0006720	isoprenoid metabolic process	0.000734436	3	134	65.5369
GO:0009812	flavonoid metabolic process	0.0010227	2	16	316.762
GO:0042445	hormone metabolic process	0.00160101	3	266	41.3168
GO:0006629	lipid metabolic process	0.00201632	5	1516	9.21713
GO:0043276	anoikis	0.00396368	2	36	118.786
GO:0006778	porphyrin-containing compound metabolic process	0.00770639	2	58	77.5743
GO:0009410	response to xenobiotic stimulus	0.00770639	3	435	21.196
GO:0019217	regulation of fatty acid metabolic process	0.00835145	2	90	65.5369
GO:0033013	tetrapyrrole metabolic process	0.00835145	2	71	65.5369
GO:0031667	response to nutrient levels	0.00918934	3	481	17.8737
GO:0034308	primary alcohol metabolic process	0.0116402	2	119	52.0705
GO:0032787	monocarboxylic acid metabolic process	0.0169888	3	628	13.5433
GO:0120254	olefinic compound metabolic process	0.0169888	2	171	40.8725
GO:0007584	response to nutrient	0.0173115	2	158	39.5952
GO:0001889	liver development	0.0196617	2	142	35.5247
GO:0061008	hepaticobiliary system development	0.0196617	2	145	34.8729
GO:0006109	regulation of carbohydrate metabolic process	0.0277638	2	186	28.3667
GO:0042180	cellular ketone metabolic process	0.0297261	2	218	26.5814
GO:0072593	reactive oxygen species metabolic process	0.0297261	2	235	26.0352
GO:0044281	small molecule metabolic process	0.0352981	4	1936	5.4302
GO:0001666	response to hypoxia	0.0372266	2	292	18.1007
GO:0005975	carbohydrate metabolic process	0.0372266	2	302	17.6797
GO:0008202	steroid metabolic process	0.0372266	2	341	19.1977
GO:0042221	response to chemical	0.0372266	5	4821	3.58869
GO:0065008	regulation of biological quality	0.0372266	5	4103	3.70337
GO:0062012	regulation of small molecule metabolic process	0.0375751	2	345	16.7451
GO:0009605	response to external stimulus	0.0390391	4	3073	4.48777
GO:0019216	regulation of lipid metabolic process	0.0390391	2	360	15.9044

## Sheet: DLD1 C.s. extract
Upregulated biological processes of DLD1 cells treated with C.s. extract
TermID	Name	Enrichment FDR	nGenes	Pathway Genes	Fold Enrichment
GO:0001523	retinoid metabolic process	2.67404e-05	4	96	85.5411
GO:0016102	diterpenoid biosynthetic process	2.67404e-05	4	99	81.6529
GO:0042573	retinoic acid metabolic process	2.67404e-05	3	34	237.754
GO:0006720	isoprenoid metabolic process	5.16924e-05	4	134	56.7273
GO:0042572	retinol metabolic process	0.000237221	3	64	98.5809
GO:0042445	hormone metabolic process	0.000284886	4	266	33.0619
GO:0006805	xenobiotic metabolic process	0.001213	3	118	51.1623
GO:0034308	primary alcohol metabolic process	0.00123343	3	119	49.2905
GO:0009812	flavonoid metabolic process	0.00196552	2	16	192.468
GO:0016114	terpenoid biosynthetic process	0.00209261	2	18	179.636
GO:0120254	olefinic compound metabolic process	0.0022723	3	171	37.0809
GO:0008299	isoprenoid biosynthetic process	0.00581077	2	33	92.9154
GO:0006778	porphyrin-containing compound metabolic process	0.0175783	2	58	50.8405
GO:0006629	lipid metabolic process	0.0197933	5	1516	5.96138
GO:0033013	tetrapyrrole metabolic process	0.0224745	2	71	42.1023
GO:0009410	response to xenobiotic stimulus	0.0280778	3	435	13.1228
GO:0048732	gland development	0.03522	3	458	11.958
